# Supplementary material for: Inhibition of EHMT2/G9a epigenetically increases the transcription of Beclin-1 via an increase in ROS and activation of NF-κB
Source: PubMed Central journal article supplement (PMC5129971; doi:10.18632/oncotarget.9290), 2016-05-11
Supplement: oncotarget-07-39796-s001.pdf [file oncotarget-07-39796-s001.pdf]

SUPPLEMENTARY FIGURES

**a** Genes up- and down-regulated in BIX 4h treated

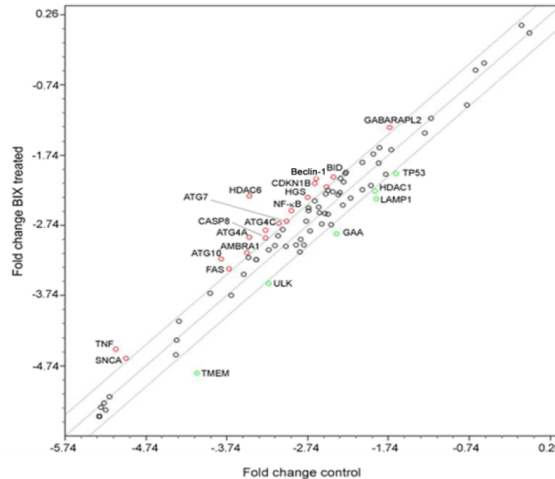

**b** Genes up-regulated or down-regulated in BIX 4h treated

| Gene Symbol | Fold Regulation | Gene Symbol | Fold Regulation |
|-------------|-----------------|-------------|-----------------|
| HDAC6       | 13.6737         | TMEM74      | -5.3889         |
| TNF         | 4.0652          | GAA         | -3.0667         |
| ATG10       | 3.8727          | LAMP1       | -2.9417         |
| Beclin-1    | 3.6469          | TP53        | -2.2815         |
| ATG4A       | 3.5884          | HDAC1       | -2.2346         |
| CDKN1B      | 3.2415          | ULK2        | -2.1936         |
| ATG4C       | 2.7895          |             |                 |
| NFKB1       | 2.5432          |             |                 |
| HGS         | 2.4909          |             |                 |
| ATG7        | 2.4116          |             |                 |
| GABARAPL2   | 2.395           |             |                 |
| BID         | 2.308           |             |                 |
| AMBRA1      | 2.308           |             |                 |
| SNCA        | 2.2553          |             |                 |
| FAS         | 2.2501          |             |                 |
| CASP8       | 2.2038          |             |                 |
| ATG12       | 2.0658          |             |                 |
| BAD         | 2.0658          |             |                 |

Genes up-regulated in BIX 24h treated

| Gene Symbol | Fold Regulation |
|-------------|-----------------|
| TNF         | 65.5426         |
| ATG4B       | 11.1659         |
| WIP1        | 3.2967          |
| Beclin-1    | 3.2363          |
| GABARLAPL1  | 3.0831          |
| MAP1LC3A    | 3.0688          |
| MAP1LC3B    | 2.8832          |
| BNIP3       | 2.8436          |
| NFKB1       | 2.684           |
| SNCA        | 2.2569          |
| ATG4A       | 2.0294          |

**Supplementary Figure S1: RT2 Profiler PCR array analysis for autophagy related gene expression in BIX-treated MCF7 cells. a. and b.** The expression of 84 key genes involved in autophagy were compared between control and cells without or with 10  $\mu$ M BIX for 4, 24 h. Graph representing fold change in the level of mRNA in cells treated with BIX against untreated cells. Each circle represents an autophagy gene; those with largest fold-changes are indicated in red. The central line represents no changes in expression; above the central line, genes whose expression is increased: below, those with reduced levels. Grey lines indicate 2-fold increase or decrease.

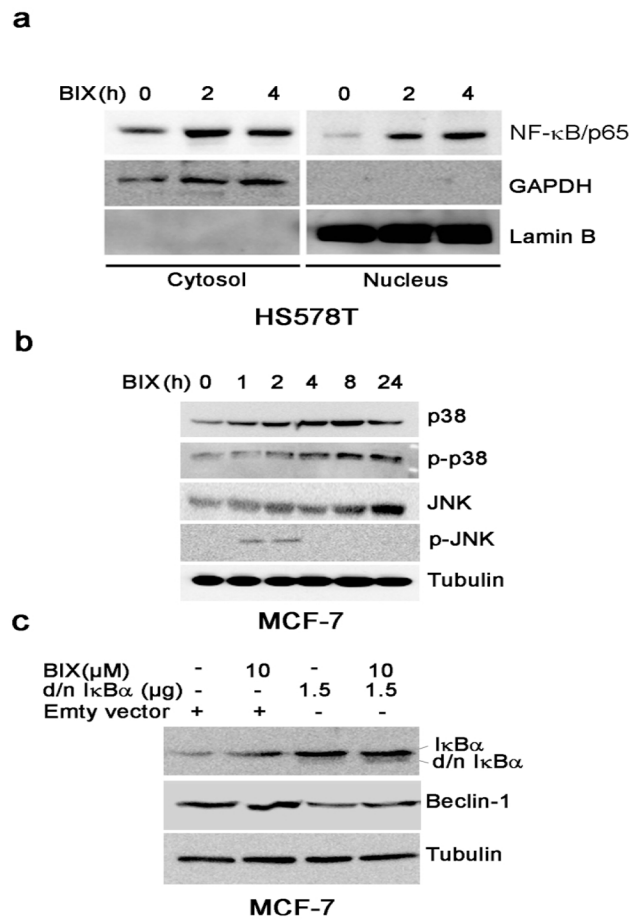

**Supplementary Figure S2: a.** BIX-induced NF-κB nuclear translocation. HS-578T cells were treated with 10 μM BIX-01294 (BIX) for indicated times. The nuclear and cytosolic fractions were separately isolated from each group and blotted with antibodies to NF-κB/65, GAPDH (cytoplasmic marker) and Lamin B (nuclear marker), respectively. **b.** Western blot analysis was performed with the antibodies specified (associated with activation of NF-κB) using the lysates from MCF-7 cells exposed to 10 μM BIX for indicated times. **c.** Inhibition of NF-κB activation and NF-κB-mediated Beclin-1 expression in MCF-7 cells by transfected d/n IκBα (IκBα dominant/negative vector). MCF-7 cells transfected with an empty vector (lane 1,2), and MCF-7 stably transfected with d/n IκBα (lanes 3,4).

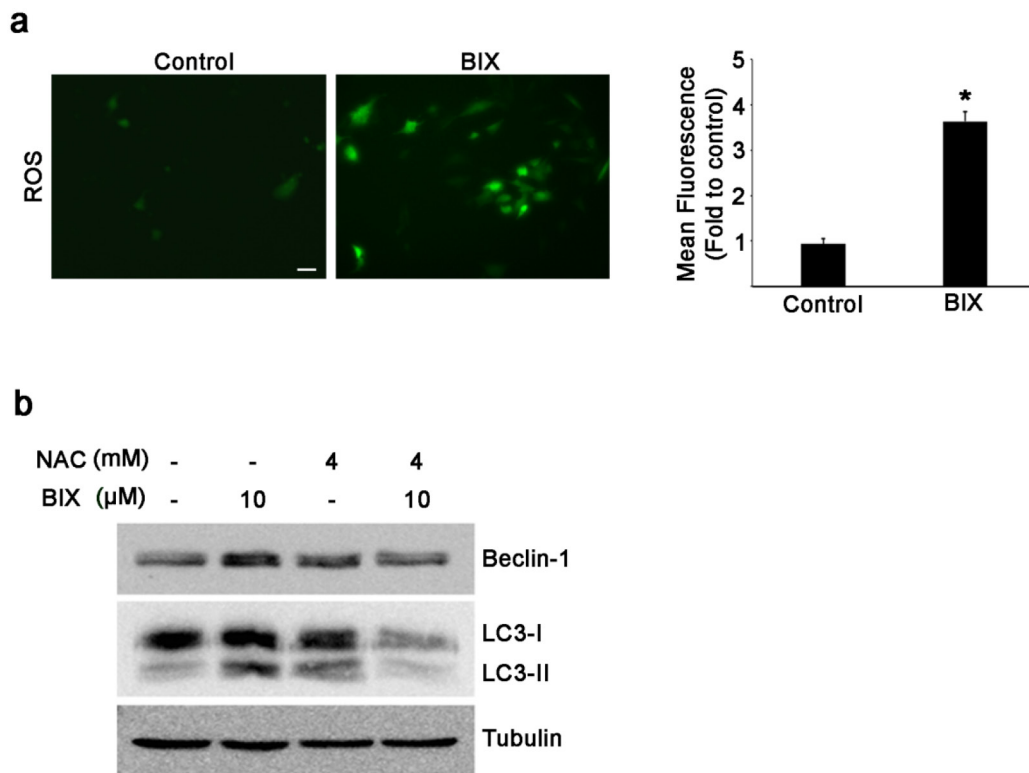

**Supplementary Figure S3: BIX induces intracellular ROS-mediated autophagy in HS578T cells.** **a.** HS578T cells were treated with 10  $\mu$ M BIX for 48 h, and stained with 1  $\mu$ M CM-H2DCF-DA for 30 min. The level of ROS was examined using fluorescence microscopy. Scale bar: 50  $\mu$ m. Bar graph represents fold increase of ROS of three independent experiments expressed as means  $\pm$  SEM \*P < 0.05 by one-way ANOVA. **b.** HS578T cells were treated with 10  $\mu$ M BIX for 4 h in the presence or absence of 4 mM NAC. Western blot analysis was performed using the specified antibodies.

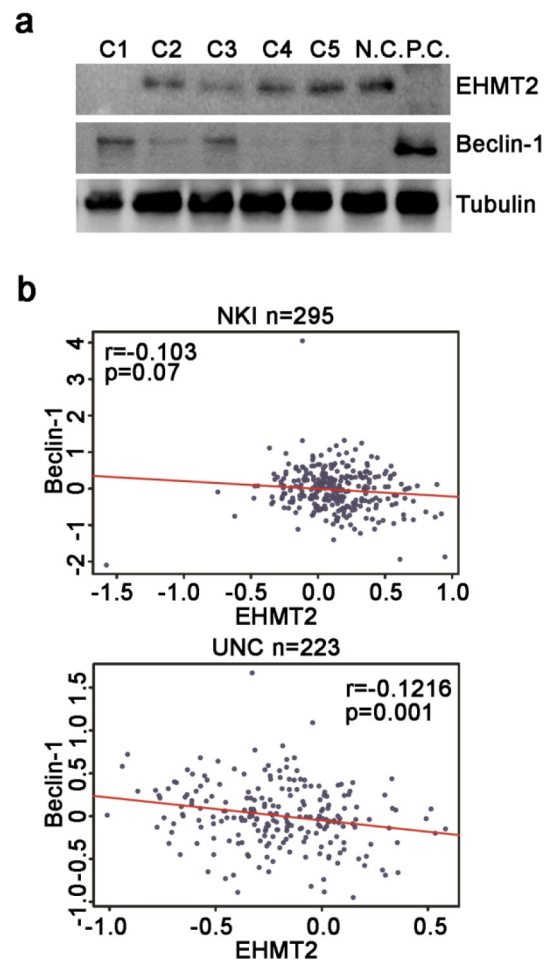

**Supplementary Figure S4: Comparison of EHMT2 expression in normal and tumor tissues.** **a.** Comparing the expression of EHMT2 and Beclin-1 in the lysates from tumors of 5 colon cancer patients (C 1–5), and normal colon tissue (N.C.) using Western blot. EHMT2 lysate was used as a EHMT2 positive control (P.C.) **b.** Correlation of Beclin-1 and EHMT2 expression in Netherlands Cancer Institute, NKI (upper box) and University of North Carolina, UNC (lower box) cohort breast cancer patients was estimated by Pearson's correlation test.
